# Supplementary material
Source: PubMed Central journal article supplement (PMC4902591)
Supplement: supp_pp.16.00034_PP2016-00034R2_Supplemental_Material_tbls.pdf [file supp_pp.16.00034_PP2016-00034R2_Supplemental_Material_tbls.pdf]

723

724 **Supplementary figures:**

725 **Figure S1A. E-score distribution of top four 6mers recognized by FUS3 and ABI3.**

726 The elements are shown in descending order in relation to their E-score. All top scoring elements  
727 recognized by both proteins share the sequence GCATG (underlined), which could be considered as a  
728 RY-core. The motif ACATGT corresponds to a “mutant” version of RY-core in which the nucleotide G  
729 at the 5' end has been replaced by an A, reflecting a decrease in E-score. Both proteins recognize  
730 similar elements, although DNA-binding affinity was slightly lower for ABI3 compared to FUS3.

731

732 **Figure S1B.** Score plots of the *proOLE1* sequence scanned with DNA-binding matrices described for  
733 LEC2, FUS3 and ABI3.

734 Since matrices correspond to pseudo-palindromic sequences, each binding site is systematically  
735 identified on both DNA strands with slightly different scores. This explains the presence of double bars  
736 in the plots.

737

738 **Figure S2.** Schematic representation of the mutagenized versions of the *OLE1* promoter used in this  
739 study.

740 Regulatory elements (RYL and GBL domains) present in the minimal *OLE1* promoter were  
741 mutagenized using site-directed mutagenesis. Mutagenized RYL (blue box) and GBL (red box) are  
742 represented. Figures indicate the position of these elements relative to the translational start site of  
743 *OLE1*.

744

745 **Figure S3.** Activation of the native or mutated *OLE1* promoter versions by LEC2 in moss protoplasts.

746 Means of at least 3 replicates +/- SD

747

748 **Figure S4.** Complementary analyses related to activation studies in moss protoplasts.

749 Transient activation of the *OLE1* promoter by LEC2 (A) or ABI3 (B) fused to a strong activator domain  
750 (VP16) were assayed in moss protoplasts. Means of at least 3 replicates +/- SD are presented.

751

752 **Figure S5. Test of synergistic effect of LEC2, LEC1, and ABI3 on the activation of several**  
753 **oleosin promoters in moss protoplasts.**

754 (A) Transient expression assays were carried out in moss protoplasts. GFP activity was measured in  
755 protoplasts transfected with *ProOLE1:GFP*, *ProOLE2:GFP*, or *ProOLE3:GFP* reporter and constructs  
756 allowing the expression of L-AFLs (LEC2, ABI3 or LEC1), alone or in combination. Means of at least 3  
757 replicates +/- SD are presented. AU, arbitrary units.

758 (B) Schematic representation of *proOLE1* (At4g25140), *proOLE2* (AT5G40420), and *proOLE3*  
759 (At5g51210) genomic regions. The RYL and GBL elements are highlighted in blue and red,  
760 respectively.

761

762 **Figure S6. *In vitro* binding of the L-AFLs to the *OLE1* promoter.**

763 Electrophoretic mobility shift assays (EMSA) with LEC1, LEC2, and ABI3 alone or in combination were  
764 carried out using a labelled 100-bp long probe corresponding region -228 to -121 (relative to the  
765 translational start site) of the *OLE1* promoter. Competition experiments were performed by adding  
766 non-labelled competitor DNA added in 25-fold molar excess. Shifted bands are indicated with stars,  
767 arrows indicate supershifts.

768

769 **Figure S7. Complementary results to pull-down experiments (Figure 6).**

770 (A-B) NF-YC2 interacts with LEC1 or its mutated version (LEC1m, D55K).

771 The HA- or Myc-tagged proteins have been co-expressed in *Arabidopsis* protoplasts. INPUT, 2 % of  
772 the full protein extract; IP, immunoprecipitated sample; \*, heavy and light chains of the antibody used  
773 for the immunoprecipitation.

774 (C-D) LEC1 and NF-YC2 interact with each other but do not interact with LEC2

775 The HA- or Myc-tagged proteins have been co-expressed in *Arabidopsis* protoplasts. INPUT, 2 % of  
776 the full protein extract; IP, immunoprecipitated sample; \*, heavy and light chains of the antibody used  
777 for the immunoprecipitation.

778

779

780 **Figure S8. Study of protein-protein interactions in yeast.**

781 (A) Summary of interaction studies carried out using a yeast two-hybrid system in strain AH109.  
782 Reciprocal interactions between LEC1, LEC2, ABI3, and FUS3 were assayed.  
783 AD, fusion to activation domain; BD, fusion to DNA-binding domain; W, tryptophan; L, leucine; H,  
784 histidine; A, alanine.  
785 (B) Study of homodimer formation between native or mutant LEC1 proteins. Yeast two hybrid  
786 experiments were performed using native (LEC1) or mutant (LEC1m D55K) proteins. W, tryptophan;  
787 L, leucine; H, Histidine; A, alanine; 3-AT, 3-amino -1,2,4-triazole.

788

789

790

791

792

793

794 **Supplementary table 1. Primers and genes used in this study.**

795

| Primer name    | 5'→3' sequence                                                | Gene   | AGI       |
|----------------|---------------------------------------------------------------|--------|-----------|
| oSB110R        | TATGCTCGAGCTAGTAGAAGTCATCGA                                   | FUS3   | At3g26790 |
| oETH1132       | GGCCATGGTTGATGAAAATGTGGAA                                     | FUS3   | At3g26790 |
| oSB109F        | TGCCATATGGCAGAGACTCAGTTACCT                                   | ABI3   | At3g24650 |
| oSB109R        | TGCGGCCGCTTGCCGCTCGGTTGTCT                                    | ABI3   | At3g24650 |
| 73 mer selex   | TGGAGAAGAGGAGAGATCTAGC(N) <sub>30</sub> CTTGTTCTTCTTCGATTCCGG | selex  |           |
| Selex F        | TGGAGAAGAGGAGAG ATCTAG                                        | selex  |           |
| Selex R        | CCGG AATCGAAGAAGAACA                                          | selex  |           |
| LEC2 F GW      | GGGGACAAGTTTGTACAAAAAGCAGGCTCGATGGATAACTTCTTACC               | LEC2   | At1g28300 |
| LEC2 R GW      | GGGGACCACTTTGTACAAGAAAGCTGGGTTCCACCACCACTCAAAG                | LEC2   | At1g28300 |
| ABI3 F GW      | GGGGACAAGTTTGTACAAAAAGCAGGCTCGATGAAAAGCTTGCATGTGGCG<br>G      | ABI3   | At3g24650 |
| ABI3 R GW      | GGGGACCACTTTGTAAAGAAAGCTGGGT GGAAATGGTGTGGTTATAT              | ABI3   | At3g24650 |
| FUS3 F GW      | GGGGACAAGTTTGTACAAAAAGCAGGCTCGATGATGGTTGATGAAAATGTG<br>G      | FUS3   | At3g26790 |
| FUS3 R GW      | GGGGACCACTTTGTAAAGAAAGCTGGGTCTAGTAGAAGTCATCGAGAG              | FUS3   | At3g26790 |
| LEC1 F GW      | GGGGACAAGTTTGTACAAAAAGCAGGCTCG ATGGAACGTGGAGCTCCCTTC          | LEC1   | At1g21970 |
| LEC1 R GW      | GGGGACCACTTTGTAAAGAAAGCTGGGTTCACTTATACTGACCATAATGG            | LEC1   | At1g21970 |
| NF-YC2 F GW    | GGGGACAAGTTTGTACAAAAAGCAGGCTTCATGGAGCAGTCAGAAGAGGGT<br>C      | NF-YC2 | AT1G56170 |
| NF-YC2 R GW    | GGGGACCACTTTGTACAAGAAAGCTGGGTCTTAAGACTCATCAGGGTGTG            | NF-YC2 | AT1G56170 |
| LEC2-stop R GW | GGGGACCACTTTGTAAAGAAAGCTGGGT CCCACTCAAAGTCGTTAAA              | LEC2   | At1g28300 |
| LEC1-stop R GW | GGGGACCACTTTGTAAAGAAAGCTGGGTCTTATACTGACCATAATGG               | LEC1   | At1g21970 |
| ABI3-stop R GW | GGGGACCACTTTGTAAAGAAAGCTGGGTCAATGGTGTGGTTATAT                 | ABI3   | At3g24650 |
| NF-YB 7 F GW   | GGGGACAAGTTTGTACAAAAAGCAGGCTATGACTGAGGAGAGCCAGAAGA<br>AG      | NF-YB7 | At2g13570 |

|                 |                                                                  |        |           |
|-----------------|------------------------------------------------------------------|--------|-----------|
| NF-YB 7 R GW    | GGGGACCACTTTGTACAAGAAAGCTGGGTCTCACCAGTGAATTGAATCAATGT<br>TATTATC | NF-YB7 | At2g13570 |
| L1L F GW        | GGGGACAAGTTTGTACAAAAAAGCAGGCTATGGAACGTGGAGGCTTCCATGG<br>C        | L1L    | At5g47670 |
| L1L R GW        | GGGGACCACTTTGTACAAGAAAGCTGGGTCTCAGTACTTATGTTGTTGAGTCG<br>G       | L1L    | At5g47670 |
| pOleo R GW      | GGGGACCACTTTGTAAAGAAAGCTGGGTCTTTTTTGTCTTGTTTACTAG                | pOleo  | At4g25140 |
| pOleo Δ526 F GW | GGGGACAAGTTTGTACAAAAAAGCAGGCTCGGAAGAGAGACGACG                    | pOleo  | At4g25140 |
| pOleo Δ257 F GW | GGGGACAAGTTTGTACAAAAAAGCAGGCTCAACGCCACATTCTGAG                   | pOleo  | At4g25140 |
| pOleo Δ220 F GW | GGGGACAAGTTTGTACAAAAAAGCAGGCTTCTTTGAATAGACTCCTCTCGTTA<br>AC      | pOleo  | At4g25140 |
| pOleo Δ187 F GW | GGGGACAAGTTTGTACAAAAAAGCAGGCTGCGGCTGCATGGTGACGCC                 | pOleo  | At4g25140 |
| pOleo Δ140 F GW | GGGGACAAGTTTGTACAAAAAAGCAGGCTCTCTCCATTGACACGTGACTTC              | pOleo  | At4g25140 |

796  
797  
798  
799  
800  
801  
802  
803  
804  
805  
806  
807

808 Supplementary table 2. List of primers used for site-directed mutagenesis of  
 809 *ProOLE1*.  
 810

| Name of the construct | Mutations (*)  | Construct used as a DNA template  | Primers            | 5'→3' Sequence                                                                                |
|-----------------------|----------------|-----------------------------------|--------------------|-----------------------------------------------------------------------------------------------|
| mutA                  | RY3,2,1/G*,2,1 | ProS3-257 (wild type) in pDONR207 | mutA-F<br>mutA-R   | AGGCAAAAAACAATTGTGTCTTTGAA<br>TTCAAAGACACAATTGTTTTTGCCT                                       |
| mutB                  | RY3,2,1/G3,2,* | ProS3-257 (wild type) in pDONR207 | mutB-F<br>mutB-R   | CATGATGTCTCCATTGACAGTTGACTTCTCGTCTCCTTTC<br>GAAAGGAGACGAGAAGTCAACTGTCAATGGAGACATCATG          |
| mutC                  | RY3,2,1/G*,*,1 | mut3 (RY3,2,1/G3,*,1)             | mutC-F<br>mutC-R   | AGGCAAAAAACAATTGTGTCTTTGAA<br>TTCAAAGACACAATTGTTTTTGCCT                                       |
| mutD                  | RY3,2,1/G3,*,* | mut3 (RY3,2,1/G3,*,1)             | mutD-F<br>mutD-R   | CATGATGTCTCCATTGACAGTTGACTTCTCGTCTCCTTTC<br>GAAAGGAGACGAGAAGTCAACTGTCAATGGAGACATCATG          |
| mutE                  | RY3,2,1/G*,2,* | mutA (RY3,2,1/G*,2,1)             | mutE-F<br>mutE-R   | CATGATGTCTCCATTGACAGTTGACTTCTCGTCTCCTTTC<br>GAAAGGAGACGAGAAGTCAACTGTCAATGGAGACATCATG          |
| mutF                  | RY3,*,1/G3,2,1 | ProS3-257 (wild type) in pDONR207 | mutF-F<br>mutF-R   | CGTTAACACATGCAGCGGCTACAACGTGACGCCATTAACACGTG<br>CACGTGTTAATGGCGTCACGTTGTAGCCGCTGCATGTGTTAACG  |
| mutG                  | RY3,2,*/G3,2,1 | ProS3-257 (wild type) in pDONR207 | mutG-F<br>mutG-R   | GGCCTACAATTACAACATGTCTCCATTG<br>CAATGGAGACATGTTGTAATTGTAGGCC                                  |
| mutH                  | RY*,2,1/G3,2,1 | ProS3-257 (wild type) in pDONR207 | mutH-F<br>mutH-R   | AGACTCCTCTCGTTAACAGTTGTAGCGGCTGCATGGTGACG<br>CGTCACCATGCAGCCGCTACAACGTGTTAACGAGAGGAGTCT       |
| mutI                  | RY*,*,1/G3,2,1 | mutH (RY*,2,1/G3,2,1)             | mutI-F<br>mutI-R   | CGTTAACAGTTGTAGCGGCTACAACGTGACGCCATTAACACGTG<br>CACGTGTTAATGGCGTCACGTTGTAGCCGCTACAACGTGTTAACG |
| mutJ                  | RY3,*,*/G3,2,1 | mutG (RY3,2,*/G3,2,1)             | mutJ-F<br>mutJ-R   | CGTTAACACATGCAGCGGCTACAACGTGACGCCATTAACACGTG<br>CACGTGTTAATGGCGTCACGTTGTAGCCGCTGCATGTGTTAACG  |
| mutK                  | RY*,2,*/G3,2,1 | mutH (RY*,2,1/G3,2,1)             | mutK-F<br>mutK-R   | GGCCTACAATTACAACATGTCTCCATTG<br>CAATGGAGACATGTTGTAATTGTAGGCC                                  |
| mutL                  | RY*,*,*/G3,2,1 | mutK (RY*,2,*/G3,2,1)             | mutL-F<br>mutL-R   | CGTTAACAGTTGTAGCGGCTACAACGTGACGCCATTAACACGTG<br>CACGTGTTAATGGCGTCACGTTGTAGCCGCTACAACGTGTTAACG |
| mutM                  | RY*,*,1/G*,2,1 | mutI (RY*,*,1/G3,2,1)             | mutM-F<br>mutM-R   | AGGCAAAAAACAATTGTGTCTTTGAA<br>TTCAAAGACACAATTGTTTTTGCCT                                       |
| mutN                  | RY*,*,1/G3,2,* | mutI (RY*,*,1/G3,2,1)             | mutN -F<br>mutN -R | CATGATGTCTCCATTGACAGTTGACTTCTCGTCTCCTTTC<br>GAAAGGAGACGAGAAGTCAACTGTCAATGGAGACATCATG          |
| mutP                  | RY*,*,1/G3,*,1 | mutI (RY*,*,1/G3,2,1)             | mutP-F<br>mutP-R   | CGTGACGCCATTAACAGTTGGCCTACAATTGCATG<br>CATGCAATTGTAGGCCAAGTCAACTGTTAATGGCGTCACG               |
| mutQ                  | RY3,*,*/G*,2,1 | mutJ (RY3,*,*/G3,2,1)             | mutQ-F<br>mutQ-R   | AGGCAAAAAACAATTGTGTCTTTGAA<br>TTCAAAGACACAATTGTTTTTGCCT                                       |
| mutR                  | RY3,*,*/G3,2,* | mutJ (RY3,*,*/G3,2,1)             | mutR-F<br>mutR-R   | CAACATGTCTCCATTGACAGTTGACTTCTCGTCTCCTTTC<br>GAAAGGAGACGAGAAGTCAACTGTCAATGGAGACATGTTG          |
| mutS                  | RY3,*,*/G3,*,1 | mutJ (RY3,*,*/G3,2,1)             | mutS-F<br>mutS-R   | CGTGACGCCATTAACAGTTGGCCTACAATTACAAC<br>GTTGTAATTGTAGGCCAAGTCAACTGTTAATGGCGTCACG               |
| mutT                  | RY*,2,*/G*,2,1 | mutK (RY*,2,*/G3,2,1)             | mutT-F<br>mutT-R   | AGGCAAAAAACAATTGTGTCTTTGAA<br>TTCAAAGACACAATTGTTTTTGCCT                                       |
| mutU                  | RY*,2,*/G3,2,* | mutK (RY*,2,*/G3,2,1)             | mutU-F<br>mutU-R   | CAACATGTCTCCATTGACAGTTGACTTCTCGTCTCCTTTC<br>GAAAGGAGACGAGAAGTCAACTGTCAATGGAGACATGTTG          |
| mutW                  | RY*,2,*/G3,*,1 | mutK (RY*,2,*/G3,2,1)             | mutW-F             | GGTGACGCCATTAACAGTTGGCCTACAATTACAAC                                                           |

|      |                |                                   |                  |                                                                            |
|------|----------------|-----------------------------------|------------------|----------------------------------------------------------------------------|
|      |                |                                   | mutW-R           | GTTGTAATTGTAGGCCAACTGTTAATGGCGTCACC                                        |
| mut2 | RY3,2,1/G*,**  | mutD (RY3,2,1/G3,*,*)             | mut2-F<br>mut2-R | AGGCAAAAAACAATTGTGTCTTTGAA<br>TTCAAAGACACAATTGTTTTTGCCT                    |
| mut3 | RY3,2,1/G3,*,1 | ProS3-257 (wild type) in pDONR207 | mut3-F<br>mut3-R | GGTGACGCCATTAACAGTTGGCCTACAATTGCATG<br>CATGCAATTGTAGGCCAACTGTTAATGGCGTCACC |



A

|                                           | proOLE1:GFP | proOLE1:GFP<br>+ LEC1 | proOLE1:GF<br>P + LEC2 | proOLE1:GFP<br>+ ABI3 | proOLE1:GFP<br>+ FUS3 | proOLE1:GFP<br>+ LEC1 +<br>LEC2 | proOLE1:GFP<br>+ ABI3<br>+ LEC1 | proOLE1:GFP<br>+ FUS3<br>+ LEC1 | proOLE1:GFP<br>+ ABI3<br>+ LEC2 | proOLE1:GFP<br>+ FUS3<br>+ ABI3 | proOLE1:GFP<br>+ LEC2<br>+ ABI3<br>+ LEC1 |
|-------------------------------------------|-------------|-----------------------|------------------------|-----------------------|-----------------------|---------------------------------|---------------------------------|---------------------------------|---------------------------------|---------------------------------|-------------------------------------------|
| proOLE1:GFP<br>+ LEC1                     | 0.2406      |                       |                        |                       |                       |                                 |                                 |                                 |                                 |                                 |                                           |
| proOLE1:GFP<br>+ LEC2                     | 5.2e-13     | 1.9e-07               |                        |                       |                       |                                 |                                 |                                 |                                 |                                 |                                           |
| proOLE1:GFP<br>+ ABI3                     | 6.6e-12     | 4.2e-07               | 1.33e-4                |                       |                       |                                 |                                 |                                 |                                 |                                 |                                           |
| proOLE1:GFP<br>+ FUS3                     | 4.8e-07     | 6.4e-05               | 3.819e-4               | 4.741e-08             |                       |                                 |                                 |                                 |                                 |                                 |                                           |
| proOLE1:GFP<br>+ LEC1<br>+ LEC2           | 3.21-11     | 1.2e-06               | 4.066e-3               | 0.6098                | NR                    |                                 |                                 |                                 |                                 |                                 |                                           |
| proOLE1:GFP<br>+ ABI3<br>+ LEC1           | 6.6e-12     | 4.2e-07               | 1.515e-09              | 8.839e-06             | NR                    | 8.83e-05                        |                                 |                                 |                                 |                                 |                                           |
| proOLE1:GFP<br>+ FU3<br>+ LEC1            | 3.06e-08    | 1.0e-05               | 7.082e-05              | 3.647e-09             | 0.2636                | 5.41e-07                        | 1.802e-07                       |                                 |                                 |                                 |                                           |
| proOLE1:GFP<br>+ ABI3<br>+ LEC2           | 1.3e-11     | 5.3e-07               | 8.532e-08              | 6.117e-3              | NR                    | NR                              | 0.0151                          | NR                              |                                 |                                 |                                           |
| proOLE1:GFP<br>+ ABI3<br>+ LEC1<br>+ LEC2 | 8.2e-15     | 6.0e-08               | 2.299e-11              | 1.643e-07             | NR                    | 6.331e-07                       | 0.02368                         | NR                              | 6.243e-05                       |                                 |                                           |
| proOLE1:GFP<br>+ FUS3<br>+ABI3            | 8.742e-07   | 5.017e-05             | 5.891 <sup>e</sup> -3  | 0.472                 | 2.955e-4              | NR                              | 0.00783                         | NR                              | 0.1375                          | NR                              |                                           |
| proOLE1:GFP<br>+ FUS3<br>+ ABI3<br>+ LEC1 | 2.997e-06   | 9.486e-05             | 8.544e-05              | 6.115e-3              | 6e-4426               | NR                              | 0.9628                          | 6.426e-4                        | NR                              | 0.09447                         | 8.03e-3                                   |

3  
4  
5  
6  
7  
8  
9  
10  
11  
12  
13  
14  
15  
16  
17  
18  
19  
20  
21  
22  
23  
24  
25



B

|                                                           | pS3 <sup>-257</sup> :GFP | pS3 <sup>-257</sup> :GFP<br>+ LEC2 | pS3 <sup>-257</sup> :GFP<br>+ LEC2<br>+ LEC1 | pS3 <sup>-257</sup> :GFP<br>+ ABI3 | pS3 <sup>-257</sup> :GFP<br>+ ABI3<br>+ LEC1 | pS3 <sup>-257</sup> :GFP<br>+ ABI3<br>+ LEC2 | pS3 <sup>-257</sup> :GFP<br>+ LEC2<br>+ LEC1<br>+ ABI3 | pS3 <sup>-257</sup> :GFP<br>+ LEC2<br>+ ABI3<br>+ NFYB7 |
|-----------------------------------------------------------|--------------------------|------------------------------------|----------------------------------------------|------------------------------------|----------------------------------------------|----------------------------------------------|--------------------------------------------------------|---------------------------------------------------------|
| pS3 <sup>-257</sup> :GFP<br>+ LEC2                        | 5.222e-13                |                                    |                                              |                                    |                                              |                                              |                                                        |                                                         |
| pS3 <sup>-257</sup> :GFP<br>+ LEC2<br>+ LEC1              | 3.214e-11                | 4.066e-3                           |                                              |                                    |                                              |                                              |                                                        |                                                         |
| pS3 <sup>-257</sup> :GFP<br>+ LEC2<br>+ NFYB7             | 4.209e-3                 | 0.195                              | 0.3667                                       |                                    |                                              |                                              |                                                        |                                                         |
| pS3 <sup>-257</sup> :GFP<br>+ LEC2<br>+ LEC1mut           | 0.004209                 | 0.1003                             | 0.01807                                      |                                    |                                              |                                              |                                                        |                                                         |
| pS3 <sup>-257</sup> :GFP<br>+ ABI3                        | 6.654e-12                | 1.332e-4                           | 0.6098                                       |                                    |                                              |                                              |                                                        |                                                         |
| pS3 <sup>-257</sup> :GFP<br>+ ABI3<br>+ LEC1              | 6.654e-12                | 1.515e-09                          | 8.83e-05                                     | 8.839e-06                          |                                              |                                              |                                                        |                                                         |
| pS3 <sup>-257</sup> :GFP<br>+ ABI3<br>+ NFYB7             | 4.209e-3                 | NR                                 | NR                                           | 0.4407                             | 0.02917                                      |                                              |                                                        |                                                         |
| pS3 <sup>-257</sup> :GFP<br>+ ABI3<br>+ LEC1mut           | 0.004209                 | NR                                 | NR                                           | 0.04274                            | 5.092e-3                                     |                                              |                                                        |                                                         |
| pS3 <sup>-257</sup> :GFP<br>+ ABI3<br>+ LEC2              | 1.336e-11                | 8.532e-08                          | NR                                           | 0.006117                           | 0.01515                                      |                                              |                                                        |                                                         |
| pS3 <sup>-257</sup> :GFP<br>+ LEC2<br>+ LEC1<br>+ ABI3    | 8.232e-15                | 2.299e-11                          | 6.331e-07                                    | 1.643e-07                          | 0.02368                                      | 6.243e-05                                    |                                                        |                                                         |
| pS3 <sup>-257</sup> :GFP<br>+ LEC2<br>+ ABI3<br>+ NFYB7   | 1.821e-4                 | NR                                 | NR                                           | NR                                 | NR                                           | 0.2421                                       | 8.974e-3                                               |                                                         |
| pS3 <sup>-257</sup> :GFP<br>+ ABI3<br>+ LEC2<br>+ LEC1mut | 4.209e-3                 | NR                                 | NR                                           | NR                                 | NR                                           | 0.1337                                       | 0.01367                                                | 0.8607                                                  |

4  
5  
6  
7  
8  
9  
10  
11  
12  
13  
14  
15  
16  
17

# C-1

|       |                     | pWt +LEC2 | pWt +ABI3 | pWt +LEC1<br>LEC2 ABI3 | pmutA +LEC2 | pmutA +ABI3 | pmutA +LEC1<br>LEC2 ABI3 | pmut3 +LEC2 | pmut3 +ABI3 | pmut3 +LEC1<br>LEC2 ABI3 | pmutB +LEC2 | pmutB +ABI3 | pmutB +LEC1<br>LEC2 ABI3 | pmut2 +LEC2 | pmut2 +ABI3 | pmut2 +LEC1<br>LEC2 ABI3 | pmutH +LEC2 | pmutH +ABI3 | pmutH +LEC1<br>LEC2 ABI3 |       |
|-------|---------------------|-----------|-----------|------------------------|-------------|-------------|--------------------------|-------------|-------------|--------------------------|-------------|-------------|--------------------------|-------------|-------------|--------------------------|-------------|-------------|--------------------------|-------|
| mut A | gain LEC2           | 0.12      |           |                        |             |             |                          |             |             |                          |             |             |                          |             |             |                          |             |             |                          |       |
| mut A | gain ABI3           |           | 0.28      |                        |             |             |                          |             |             |                          |             |             |                          |             |             |                          |             |             |                          |       |
| mut A | gain LEC2 LEC1 ABI3 |           |           | 0.014                  | 0.005       | 0.002       |                          |             |             |                          |             |             |                          |             |             |                          |             |             |                          |       |
| mut 3 | gain LEC2           | 0.25      |           |                        | 0.15        |             |                          |             |             |                          |             |             |                          |             |             |                          |             |             |                          |       |
| mut 3 | gain ABI3           |           | 0.11      |                        |             | 0.25        |                          |             |             |                          |             |             |                          |             |             |                          |             |             |                          |       |
| mut 3 | gain LEC2 LEC1 ABI3 |           |           | 0.001                  |             |             | 0.008                    | 0.97        | 0.012       |                          |             |             |                          |             |             |                          |             |             |                          |       |
| mutB  | gain LEC2           | 0.84      |           |                        | 0.40        |             |                          | 0.34        |             |                          |             |             |                          |             |             |                          |             |             |                          |       |
| mutB  | gain ABI3           |           | 0.16      |                        |             | 0.09        |                          |             | 0.039       |                          |             |             |                          |             |             |                          |             |             |                          |       |
| mutB  | gain LEC2 LEC1 ABI3 |           |           | 0.057                  |             |             | 0.52                     |             |             | 0.019                    | 0.007       | 0.016       |                          |             |             |                          |             |             |                          |       |
| mut2  | gain LEC2           | 0.003     |           |                        | 0.004       |             |                          | 0.05        |             |                          | 0.079       |             |                          |             |             |                          |             |             |                          |       |
| mut2  | gain ABI3           |           | 0.001     |                        |             | 0.008       |                          |             | 0.13        |                          |             | 0.023       |                          |             |             |                          |             |             |                          |       |
| mut2  | gain LEC2 LEC1 ABI3 |           |           | 0.002                  |             |             | 0.004                    |             |             | 0.014                    |             |             | 0.010                    | 0.010       | 0.007       |                          |             |             |                          |       |
| mutH  | gain LEC2           | 0.009     |           |                        | 0.003       |             |                          | 0.051       |             |                          | 0.072       |             |                          | 0.34        |             |                          |             |             |                          |       |
| mutH  | gain ABI3           |           | 0.13      |                        |             | 0.26        |                          |             | 0.89        |                          |             | 0.037       |                          |             | 0.21        |                          |             |             |                          |       |
| mutH  | gain LEC2 LEC1 ABI3 |           |           | 0.02                   |             |             | 0.20                     |             |             | 0.42                     |             |             | 0.13                     |             |             | 0.086                    | 0.047       | 0.056       |                          |       |
| mutF  | gain LEC2           | 0.007     |           |                        | 0.002       |             |                          | 0.052       |             |                          | 0.077       |             |                          | 0.55        |             |                          | 0.35        |             |                          |       |
| mutF  | gain ABI3           |           | 0.18      |                        |             | 0.37        |                          |             | 0.88        |                          |             | 0.047       |                          |             | 0.14        |                          |             |             |                          | 0.79  |
| mutF  | gain LEC2 LEC1 ABI3 |           |           | 0.002                  |             |             | 0.024                    |             |             | 0.16                     |             |             | 0.040                    |             |             | 0.002                    |             |             |                          | 0.81  |
| mutG  | gain LEC2           | 0.013     |           |                        | 0.006       |             |                          | 0.06        |             |                          | 0.11        |             |                          | 0.26        |             |                          | 0.004       |             |                          |       |
| mutG  | gain ABI3           |           | 0.75      |                        |             | 0.45        |                          |             | 0.18        |                          |             | 0.31        |                          | 0.06        |             |                          |             |             | 0.17                     |       |
| mutG  | gain LEC2 LEC1 ABI3 |           |           | 0.040                  |             |             | 0.76                     |             |             | 0.07                     |             |             | 0.45                     |             |             | 0.026                    |             |             |                          | 0.31  |
| mutI  | gain LEC2           | 0.006     |           |                        | 0.0014      |             |                          | 0.049       |             |                          | 0.070       |             |                          | 0.30        |             |                          | 0.82        |             |                          |       |
| mutI  | gain ABI3           |           | 0.011     |                        |             | 0.03        |                          |             | 0.34        |                          |             | 0.026       |                          |             | 0.27        |                          |             |             | 0.47                     |       |
| mutI  | gain LEC2 LEC1 ABI3 |           |           | 0.005                  |             |             | 0.014                    |             |             | 0.13                     |             |             | 0.022                    |             |             | 0.010                    |             |             |                          | 0.20  |
| mutJ  | gain LEC2           | 0.009     |           |                        | 0.005       |             |                          | 0.049       |             |                          | 0.070       |             |                          | 0.26        |             |                          | 0.41        |             |                          |       |
| mutJ  | gain ABI3           |           | 0.018     |                        |             | 0.044       |                          |             | 0.42        |                          |             | 0.026       |                          |             | 0.23        |                          |             |             | 0.55                     |       |
| mutJ  | gain LEC2 LEC1 ABI3 |           |           | 0.003                  |             |             | 0.006                    |             |             | 0.017                    |             |             | 0.012                    |             |             | 0.42                     |             |             |                          | 0.081 |
| mut K | gain LEC2           | 0.009     |           |                        | 0.004       |             |                          | 0.050       |             |                          | 0.071       |             |                          | 0.28        |             |                          | 0.57        |             |                          |       |
| mut K | gain ABI3           |           | 0.08      |                        |             | 0.29        |                          |             | 0.70        |                          |             | 0.052       |                          |             | 0.035       |                          |             |             | 0.63                     |       |
| mut K | gain LEC2 LEC1 ABI3 |           |           | 0.006                  |             |             | 0.08                     |             |             | 0.31                     |             |             | 0.057                    |             |             | 0.042                    |             |             |                          | 0.93  |
| mutL  | gain LEC2           | 0.009     |           |                        | 0.005       |             |                          | 0.045       |             |                          | 0.062       |             |                          | 0.13        |             |                          | 0.03        |             |                          |       |
| mutL  | gain ABI3           |           | 0.002     |                        |             | 0.022       |                          |             | 0.32        |                          |             | 0.033       |                          |             | 0.16        |                          |             |             | 0.45                     |       |
| mutL  | gain LEC2 LEC1 ABI3 |           |           | 0.001                  |             |             | 0.007                    |             |             | 0.30                     |             |             | 0.008                    |             | 0.12        |                          |             |             |                          | 0.21  |

# C-2

|                            | pmutF<br>+LEC2 | pmutF<br>+ABI3 | pmutF<br>+LEC1 LEC2<br>ABI3 | pmutG<br>+LEC2 | pmutG<br>+ABI3 | pmutG<br>+LEC1 LEC2<br>ABI3 | pmutI<br>+LEC2 | pmutI<br>+ABI3 | pmutI<br>+LEC1 LEC2<br>ABI3 | pmutJ<br>+LEC2 | pmutJ<br>+ABI3 | pmutJ<br>+LEC1 LEC2<br>ABI3 | pmutK<br>+LEC2 | pmutK<br>+ABI3 | pmutK<br>+LEC1 LEC2<br>ABI3 | pmutK<br>+LEC2 | pmutK<br>+ABI3 |
|----------------------------|----------------|----------------|-----------------------------|----------------|----------------|-----------------------------|----------------|----------------|-----------------------------|----------------|----------------|-----------------------------|----------------|----------------|-----------------------------|----------------|----------------|
| pmut A gain LEC2           |                |                |                             |                |                |                             |                |                |                             |                |                |                             |                |                |                             |                |                |
| pmut A gain ABI3           |                |                |                             |                |                |                             |                |                |                             |                |                |                             |                |                |                             |                |                |
| pmut A gain LEC2 LEC1 ABI3 |                |                |                             |                |                |                             |                |                |                             |                |                |                             |                |                |                             |                |                |
| pmut 3 gain LEC2           |                |                |                             |                |                |                             |                |                |                             |                |                |                             |                |                |                             |                |                |
| pmut 3 gain ABI3           |                |                |                             |                |                |                             |                |                |                             |                |                |                             |                |                |                             |                |                |
| pmut 3 gain LEC2 LEC1 ABI3 |                |                |                             |                |                |                             |                |                |                             |                |                |                             |                |                |                             |                |                |
| pmutB gain LEC2            |                |                |                             |                |                |                             |                |                |                             |                |                |                             |                |                |                             |                |                |
| pmutB gain ABI3            |                |                |                             |                |                |                             |                |                |                             |                |                |                             |                |                |                             |                |                |
| pmutB gain LEC2 LEC1 ABI3  |                |                |                             |                |                |                             |                |                |                             |                |                |                             |                |                |                             |                |                |
| pmut2 gain LEC2            |                |                |                             |                |                |                             |                |                |                             |                |                |                             |                |                |                             |                |                |
| pmut2 gain ABI3            |                |                |                             |                |                |                             |                |                |                             |                |                |                             |                |                |                             |                |                |
| pmut2 gain LEC2 LEC1 ABI3  |                |                |                             |                |                |                             |                |                |                             |                |                |                             |                |                |                             |                |                |
| pmutH gain LEC2            |                |                |                             |                |                |                             |                |                |                             |                |                |                             |                |                |                             |                |                |
| pmutH gain ABI3            |                |                |                             |                |                |                             |                |                |                             |                |                |                             |                |                |                             |                |                |
| pmutH gain LEC2 LEC1 ABI3  |                |                |                             |                |                |                             |                |                |                             |                |                |                             |                |                |                             |                |                |
| pmutF gain LEC2            |                |                |                             |                |                |                             |                |                |                             |                |                |                             |                |                |                             |                |                |
| pmutF gain ABI3            |                |                |                             |                |                |                             |                |                |                             |                |                |                             |                |                |                             |                |                |
| pmutF gain LEC2 LEC1 ABI3  | 0.002          | 0.009          |                             |                |                |                             |                |                |                             |                |                |                             |                |                |                             |                |                |
| pmutG gain LEC2            | 0.013          |                |                             |                |                |                             |                |                |                             |                |                |                             |                |                |                             |                |                |
| pmutG gain ABI3            |                | 0.22           |                             |                |                |                             |                |                |                             |                |                |                             |                |                |                             |                |                |
| pmutG gain LEC2 LEC1 ABI3  |                |                | 0.14                        | 0.020          | 0.026          |                             |                |                |                             |                |                |                             |                |                |                             |                |                |
| pmutI gain LEC2            | 0.34           |                |                             | 0.09           |                |                             |                |                |                             |                |                |                             |                |                |                             |                |                |
| pmutI gain ABI3            |                | 0.32           |                             |                | 0.052          |                             |                |                |                             |                |                |                             |                |                |                             |                |                |
| pmutI gain LEC2 LEC1 ABI3  |                |                | 0.027                       |                |                |                             | 0.0003         | 0.015          |                             |                |                |                             |                |                |                             |                |                |
| pmutJ gain LEC2            | 0.18           |                |                             | 0.005          |                |                             | 0.76           |                |                             |                |                |                             |                |                |                             |                |                |
| pmutJ gain ABI3            |                | 0.38           |                             |                | 0.10           |                             |                | 0.84           |                             |                |                |                             |                |                |                             |                |                |
| pmutJ gain LEC2 LEC1 ABI3  |                |                | 0.005                       |                |                | 0.026                       |                |                | 0.001                       | 0.0014         | 0.19           |                             |                |                |                             |                |                |
| pmut K gain LEC2           | 0.21           |                |                             | 0.003          |                |                             | 0.87           |                |                             | 0.79           |                |                             |                |                |                             |                |                |
| pmut K gain ABI3           |                | 0.86           |                             |                | 0.23           |                             |                | 0.13           |                             |                | 0.18           |                             |                |                |                             |                |                |
| pmut K gain LEC2 LEC1 ABI3 |                |                | 0.84                        |                |                | 0.20                        |                |                | 0.12                        |                |                | 0.041                       | 0.023          | 0.031          |                             |                |                |
| pmutL gain LEC2            | 0.048          |                |                             | 0.007          |                |                             | 0.11           |                |                             | 0.021          |                |                             | 0.036          |                |                             |                |                |
| pmutL gain ABI3            |                | 0.31           |                             |                | 0.10           |                             |                | 1              |                             |                | 0.82           |                             |                | 0.10           |                             |                |                |
| pmutL gain LEC2 LEC1 ABI3  |                |                | 0.08                        |                |                | 0.033                       |                |                | 0.92                        |                |                | 0.11                        |                |                | 0.12                        | 0.034          | 0.052          |

- 2
- 3 (A) Statistical analyses corresponding to the results presented in Figure 3.
- 4 (B) Statistical analyses corresponding to the results presented in Figure 4
- 5 (C) Statistical analyses corresponding to the results presented in Figure 5 (C1, to be continued with C2)

6 Red: significant differences at 5%

7 NR: not relevant.

8 For A and B, the normality of the data was checked with a Shapiro-Wilk test. As the samples were not all following a Normal law, a Kolmogorov-Smirnov test  
 9 was then performed on the relevant comparisons. All the tests are included in the R package

2 C: The normality of the data was checked with a Shapiro-Wilk test. Student t-test was performed on the relevant comparisons using the R stats Package  
3 (<https://www.r-project.org/>) version 3.2.
